# Supplementary material for: The Association of Gene Variants in the Vitamin D Metabolic Pathway and Its Interaction with Vitamin D on Gestational Diabetes Mellitus: A Prospective Cohort Study
Source: MDPI journal article supplement (doi:10.3390/nu13124220), 2021-11-24
Supplement: s1 [file s1]

Supplementary Table S1. Baseline characteristics of pregnant women with different GDM subtypes

| Variables                             | GDM subtype 1<br><i>n</i> = 144 | GDM subtype 2<br><i>n</i> = 300 | GDM subtype 3<br><i>n</i> = 69 | <i>P</i> |
|---------------------------------------|---------------------------------|---------------------------------|--------------------------------|----------|
| Age, yrs                              | 28.4±3.6                        | 30.0±4.2                        | 30.4±3.6                       | <0.0001  |
| Prepregnancy BMI (kg/m <sup>2</sup> ) | 21.4±2.9                        | 21.0±3.0                        | 22.7±2.7                       | <0.0001  |
| 25(OH)D at T1 (ng/mL) <sup>a</sup>    | 17.6±6.8                        | 20.3±9.6                        | 19.9±6.7                       | 0.0180   |
| 25(OH)D at T2 (ng/mL) <sup>b</sup>    | 20.3±8.8                        | 27.7±11.1                       | 21.3±9.6                       | <0.0001  |
| VitD deficiency at T1 <sup>a</sup>    | 97 (69.3%)                      | 171 (58.6%)                     | 34 (52.3%)                     | 0.0332   |
| VitD deficiency at T2 <sup>b</sup>    | 68 (61.8%)                      | 38 (25.7%)                      | 21 (50.0%)                     | <0.0001  |
| OGTT season                           |                                 |                                 |                                | <0.0001  |
| Summer/fall                           | 37 (25.7%)                      | 178 (59.3%)                     | 17 (24.6%)                     |          |
| Winter/spring                         | 107 (74.3%)                     | 122 (40.7%)                     | 52 (75.4%)                     |          |
| Educational level                     |                                 |                                 |                                | 0.0497   |
| ≤ High school                         | 46 (31.9%)                      | 85 (28.3%)                      | 30 (43.5%)                     |          |
| > High school                         | 98 (68.1%)                      | 215 (71.7%)                     | 39 (56.5%)                     |          |
| Income per capita, yuan               |                                 |                                 |                                | 0.1494   |
| <30,000                               | 20 (13.89%)                     | 25 (8.33%)                      | 3 (4.35%)                      |          |
| ≥30,000                               | 106 (73.61%)                    | 216 (72%)                       | 56 (81.16%)                    |          |
| Not sure                              | 9 (6.25%)                       | 33 (11%)                        | 6 (8.7%)                       |          |
| Unknown                               | 9 (6.25%)                       | 26 (8.67%)                      | 4 (5.8%)                       |          |
| Planned pregnancy                     |                                 |                                 |                                | 0.2839   |
| No                                    | 35 (24.31%)                     | 88 (29.33%)                     | 23 (33.33%)                    |          |
| Yes                                   | 102 (70.83%)                    | 186 (62%)                       | 42 (60.87%)                    |          |
| Unknown                               | 7 (4.86%)                       | 26 (8.67%)                      | 4 (5.8%)                       |          |
| Marital status                        |                                 |                                 |                                | 0.0011*  |
| Not married                           | 4 (2.78%)                       | 7 (2.33%)                       | 1 (1.45%)                      |          |

|                          |              |              |             |        |
|--------------------------|--------------|--------------|-------------|--------|
| Married                  | 133 (92.36%) | 268 (89.33%) | 63 (91.3%)  | 0.4831 |
| Unknown                  | 7 (4.86%)    | 25 (8.33%)   | 5 (7.25%)   |        |
| <b>VitD supplement</b>   |              |              |             |        |
| 0/week                   | 56 (38.89%)  | 92 (30.67%)  | 24 (34.78%) | 0.0002 |
| >0/week                  | 79 (54.86%)  | 181 (60.33%) | 39 (56.52%) |        |
| Unknown                  | 9 (6.25%)    | 27 (9%)      | 6 (8.7%)    |        |
| <b>Primiparity</b>       |              |              |             | 0.9600 |
| No                       | 25 (17.36%)  | 81 (27%)     | 26 (37.68%) |        |
| Yes                      | 116 (80.56%) | 189 (63%)    | 37 (53.62%) |        |
| Unknown                  | 3 (2.08%)    | 30 (10%)     | 6 (8.7%)    |        |
| <b>Physical exercise</b> |              |              |             |        |
| 0/week                   | 110 (76.39%) | 226 (75.33%) | 55 (79.71%) |        |
| >0/week                  | 22 (15.28%)  | 48 (16%)     | 9 (13.04%)  |        |
| Unknown                  | 12 (8.33%)   | 26 (8.67%)   | 5 (7.25%)   |        |

---

Abbreviation: GDM, gestational diabetes mellitus; VitD, vitamin D; T1, first trimester; T2, second trimester; OGTT, oral glucose tolerance test.

<sup>a</sup>  $n = 497$ , <sup>b</sup>  $n = 300$

\*Fisher's exact test

Supplementary Table S2. Association of SNPs and its interaction with 25(OH)D concentrations at T1 and T2 on three time-point plasma glucose level of OGTT \*.

| SNPs              | Genotypes | <i>n</i> | FBG (mmol/L)    |              |          | PG1H (mmol/L)   |              |                     | PG2H (mmol/L)   |              |                     |
|-------------------|-----------|----------|-----------------|--------------|----------|-----------------|--------------|---------------------|-----------------|--------------|---------------------|
|                   |           |          | Mean            | β (SE)       | <i>P</i> | Mean            | β (SE)       | <i>P</i>            | Mean            | β (SE)       | <i>P</i>            |
|                   |           |          | ±SD<br>(mmol/L) |              |          | ±SD<br>(mmol/L) |              |                     | ±SD<br>(mmol/L) |              |                     |
| VitD-related SNPs |           |          |                 |              |          |                 |              |                     |                 |              |                     |
| <i>CYP24A1</i>    |           |          |                 |              |          |                 |              |                     |                 |              |                     |
| rs2209314         | TT        | 770      | 4.55±0.47       | Ref          | —        | 7.75±1.65       | Ref          | —                   | 6.93±1.40       | Ref          | —                   |
|                   | CT        | 1039     | 4.53±0.45       | -0.01 (0.02) | 0.4607   | 7.83±1.62       | 0.10 (0.08)  | 0.1992              | 6.92±1.37       | -0.00 (0.06) | 0.9439 <sup>†</sup> |
|                   | CC        | 335      | 4.53±0.44       | -0.01 (0.03) | 0.6233   | 7.82±1.64       | 0.07 (0.10)  | 0.4737              | 6.92±1.23       | -0.01 (0.09) | 0.9385              |
| <i>CYP3A4</i>     |           |          |                 |              |          |                 |              |                     |                 |              |                     |
| rs2242480         | CC        | 1229     | 4.54±0.45       | Ref          | —        | 7.79±1.61       | Ref          | —                   | 6.93±1.37       | Ref          | —                   |
|                   | CT        | 790      | 4.53±0.47       | 0.02 (0.02)  | 0.3588   | 7.79±1.67       | -0.02 (0.07) | 0.8164 <sup>†</sup> | 6.89±1.35       | -0.08 (0.06) | 0.1617              |
|                   | TT        | 125      | 4.52±0.39       | 0.01 (0.04)  | 0.8962   | 7.91±1.65       | 0.12 (0.15)  | 0.4050              | 6.98±1.41       | 0.03 (0.12)  | 0.7956              |
| <i>GC</i>         |           |          |                 |              |          |                 |              |                     |                 |              |                     |
| rs1155563         | TT        | 761      | 4.53±0.46       | Ref          | —        | 7.75±1.61       | Ref          | —                   | 6.91±1.36       | Ref          | —                   |
|                   | TC        | 1019     | 4.54±0.45       | 0.01 (0.02)  | 0.6546   | 7.79±1.67       | 0.06 (0.08)  | 0.4289              | 6.91±1.35       | 0.02 (0.06)  | 0.7995              |
|                   | CC        | 362      | 4.54±0.48       | 0.01 (0.03)  | 0.7430   | 7.90±1.56       | 0.12 (0.10)  | 0.2580              | 6.96±1.41       | 0.03 (0.08)  | 0.7598              |
| rs16846876        | AA        | 1017     | 4.53±0.46       | Ref          | —        | 7.75±1.65       | Ref          | —                   | 6.88±1.35       | Ref          | —                   |
|                   | AT        | 899      | 4.54±0.46       | 0.00 (0.02)  | 0.9360   | 7.85±1.59       | 0.08 (0.07)  | 0.2929              | 6.96±1.37       | 0.05 (0.06)  | 0.3846              |
|                   | TT        | 231      | 4.55±0.45       | 0.02 (0.03)  | 0.5963   | 7.77±1.73       | -0.02 (0.12) | 0.8918              | 6.90±1.41       | -0.01 (0.10) | 0.9086 <sup>†</sup> |
| rs17467825        | AA        | 1008     | 4.52±0.45       | Ref          | —        | 7.78±1.62       | Ref          | —                   | 6.90±1.34       | Ref          | —                   |
|                   | GA        | 909      | 4.55±0.46       | 0.01 (0.02)  | 0.5559   | 7.81±1.63       | 0.02 (0.07)  | 0.7811              | 6.95±1.38       | 0.05 (0.06)  | 0.4486              |
|                   | GG        | 234      | 4.55±0.45       | 0.01 (0.03)  | 0.6360   | 7.81±1.69       | -0.01 (0.12) | 0.9115              | 6.91±1.40       | -0.01 (0.10) | 0.9414              |
| rs2282679         | TT        | 1009     | 4.52±0.45       | Ref          | —        | 7.79±1.62       | Ref          | —                   | 6.91±1.33       | Ref          | —                   |
|                   | GT        | 899      | 4.55±0.46       | 0.01 (0.02)  | 0.7194   | 7.81±1.63       | 0.02 (0.07)  | 0.7747              | 6.94±1.39       | 0.04 (0.06)  | 0.5404              |

|                         |    |      |           |              |        |           |              |                     |           |              |                     |
|-------------------------|----|------|-----------|--------------|--------|-----------|--------------|---------------------|-----------|--------------|---------------------|
| rs2298849               | GG | 241  | 4.55±0.45 | 0.01 (0.03)  | 0.7744 | 7.79±1.69 | -0.04 (0.11) | 0.7393              | 6.91±1.39 | -0.02 (0.09) | 0.8468              |
|                         | AA | 894  | 4.55±0.45 | Ref          | —      | 7.83±1.60 | Ref          | —                   | 6.94±1.34 | Ref          | —                   |
|                         | GA | 960  | 4.52±0.46 | -0.02 (0.02) | 0.3963 | 7.79±1.69 | -0.02 (0.07) | 0.8155 <sup>†</sup> | 6.92±1.39 | -0.00 (0.06) | 0.9476 <sup>†</sup> |
| rs2298850               | GG | 299  | 4.53±0.44 | -0.03 (0.03) | 0.3182 | 7.69±1.57 | -0.16 (0.11) | 0.1451              | 6.87±1.35 | -0.08 (0.09) | 0.3667              |
|                         | GG | 982  | 4.52±0.45 | Ref          | —      | 7.78±1.63 | Ref          | —                   | 6.90±1.33 | Ref          | —                   |
|                         | CG | 911  | 4.55±0.46 | 0.01 (0.02)  | 0.6255 | 7.81±1.64 | 0.02 (0.07)  | 0.7636              | 6.94±1.39 | 0.04 (0.06)  | 0.5214              |
| rs3755967               | CC | 240  | 4.54±0.45 | 0.01 (0.03)  | 0.8547 | 7.77±1.68 | -0.05 (0.11) | 0.6448              | 6.90±1.39 | -0.02 (0.09) | 0.8470              |
|                         | CC | 1005 | 4.52±0.45 | Ref          | —      | 7.78±1.62 | Ref          | —                   | 6.90±1.33 | Ref          | —                   |
|                         | CT | 907  | 4.55±0.46 | 0.01 (0.02)  | 0.6228 | 7.81±1.64 | 0.03 (0.07)  | 0.6711              | 6.94±1.39 | 0.04 (0.06)  | 0.4980              |
| rs4588                  | TT | 241  | 4.55±0.45 | 0.01 (0.03)  | 0.7422 | 7.79±1.69 | -0.03 (0.11) | 0.7815              | 6.91±1.39 | -0.02 (0.09) | 0.8635              |
|                         | GG | 994  | 4.52±0.46 | Ref          | —      | 7.79±1.62 | Ref          | —                   | 6.91±1.33 | Ref          | —                   |
|                         | GT | 909  | 4.55±0.46 | 0.01 (0.02)  | 0.7144 | 7.80±1.64 | 0.01 (0.07)  | 0.8886              | 6.94±1.39 | 0.03 (0.06)  | 0.6419              |
| rs7041                  | TT | 241  | 4.54±0.45 | 0.00 (0.03)  | 0.9165 | 7.78±1.69 | -0.05 (0.11) | 0.6719              | 6.90±1.39 | -0.03 (0.09) | 0.7398              |
|                         | AA | 1162 | 4.55±0.46 | Ref          | —      | 7.78±1.64 | Ref          | —                   | 6.91±1.36 | Ref          | —                   |
|                         | CA | 826  | 4.53±0.45 | -0.02 (0.02) | 0.2791 | 7.80±1.61 | 0.02 (0.07)  | 0.7835              | 6.92±1.37 | 0.00 (0.06)  | 0.9442              |
|                         | CC | 162  | 4.52±0.49 | 0.02 (0.03)  | 0.5486 | 7.85±1.70 | 0.10 (0.13)  | 0.4754              | 6.98±1.30 | 0.06 (0.11)  | 0.5571              |
| <b><i>LRP2</i></b>      |    |      |           |              |        |           |              |                     |           |              |                     |
| rs10210408              | CC | 703  | 4.53±0.43 | Ref          | —      | 7.89±1.66 | Ref          | —                   | 7.03±1.39 | Ref          | —                   |
|                         | TC | 1065 | 4.53±0.47 | 0.00 (0.02)  | 0.9225 | 7.71±1.64 | -0.19 (0.08) | 0.0119              | 6.84±1.34 | -0.21 (0.06) | 0.0012              |
|                         | TT | 385  | 4.55±0.48 | 0.03 (0.03)  | 0.3012 | 7.84±1.56 | -0.03 (0.10) | 0.7792              | 6.94±1.35 | -0.06 (0.08) | 0.4514              |
| <b><i>VDR</i></b>       |    |      |           |              |        |           |              |                     |           |              |                     |
| rs10783219              | AA | 809  | 4.53±0.45 | Ref          | —      | 7.72±1.57 | Ref          | —                   | 6.88±1.31 | Ref          | —                   |
|                         | TA | 1010 | 4.54±0.45 | 0.00 (0.02)  | 0.8998 | 7.82±1.64 | 0.10 (0.07)  | 0.1741              | 6.94±1.40 | 0.08 (0.06)  | 0.2237              |
|                         | TT | 332  | 4.54±0.49 | -0.00 (0.03) | 0.9873 | 7.93±1.76 | 0.24 (0.10)  | 0.0212              | 6.96±1.36 | 0.09 (0.09)  | 0.2890              |
| <b>GDM-related SNPs</b> |    |      |           |              |        |           |              |                     |           |              |                     |
| <b><i>CDKAL1</i></b>    |    |      |           |              |        |           |              |                     |           |              |                     |
| rs7754840               | GG | 635  | 4.49±0.46 | Ref          | —      | 7.72±1.61 | Ref          | —                   | 7.00±1.32 | Ref          | —                   |

|                       |       |      |           |              |        |           |              |                     |           |              |                     |
|-----------------------|-------|------|-----------|--------------|--------|-----------|--------------|---------------------|-----------|--------------|---------------------|
| rs7754840             | GC    | 820  | 4.50±0.42 | 0.01 (0.02)  | 0.5145 | 7.85±1.55 | 0.12 (0.08)  | 0.1541              | 6.95±1.38 | -0.05 (0.07) | 0.4358              |
|                       | CC    | 264  | 4.50±0.46 | 0.02 (0.03)  | 0.4053 | 7.90±1.75 | 0.20 (0.11)  | 0.0766 <sup>†</sup> | 7.10±1.40 | 0.13 (0.10)  | 0.1803              |
|                       | GC/GG | 1455 | 4.49±0.44 | Ref          | —      | 7.79±1.58 | Ref          | —                   | 6.97±1.35 | Ref          | —                   |
|                       | CC    | 264  | 4.50±0.46 | 0.01 (0.03)  | 0.6553 | 7.90±1.75 | 0.15 (0.10)  | 0.1432              | 7.10±1.40 | 0.19 (0.08)  | 0.0211              |
| <b><i>IGF2BP2</i></b> |       |      |           |              |        |           |              |                     |           |              |                     |
| rs1470579             | AA    | 966  | 4.50±0.44 | Ref          | —      | 7.79±1.56 | Ref          | —                   | 7.00±1.36 | Ref          | —                   |
|                       | CA    | 664  | 4.49±0.43 | -0.01 (0.02) | 0.7562 | 7.82±1.68 | 0.04 (0.08)  | 0.6519              | 6.97±1.37 | -0.02 (0.07) | 0.7266              |
|                       | CC    | 89   | 4.43±0.47 | -0.07 (0.04) | 0.0870 | 7.87±1.54 | 0.04 (0.17)  | 0.8002              | 7.00±1.25 | -0.02 (0.14) | 0.8833              |
| <b><i>MTNR1B</i></b>  |       |      |           |              |        |           |              |                     |           |              |                     |
| rs10830962            | CC    | 572  | 4.48±0.42 | Ref          | —      | 7.58±1.54 | Ref          | —                   | 6.88±1.31 | Ref          | —                   |
|                       | GC    | 850  | 4.49±0.46 | 0.03 (0.02)  | 0.1968 | 7.84±1.64 | 0.26 (0.08)  | 0.0019              | 7.02±1.40 | 0.13 (0.07)  | 0.0601 <sup>†</sup> |
|                       | GG    | 297  | 4.52±0.44 | 0.08 (0.03)  | 0.0041 | 8.16±1.56 | 0.61 (0.11)  | <.0001              | 7.11±1.33 | 0.24 (0.09)  | 0.0113              |
| <b><i>PRKCE</i></b>   |       |      |           |              |        |           |              |                     |           |              |                     |
| rs11682804            | GG    | 839  | 4.47±0.44 | Ref          | —      | 7.73±1.57 | Ref          | —                   | 6.91±1.34 | Ref          | —                   |
|                       | AG    | 745  | 4.51±0.44 | 0.04 (0.02)  | 0.0254 | 7.92±1.63 | 0.17 (0.08)  | 0.0335              | 7.07±1.38 | 0.13 (0.07)  | 0.0440              |
|                       | AA    | 138  | 4.53±0.45 | 0.05 (0.04)  | 0.1504 | 7.66±1.61 | -0.07 (0.14) | 0.6070              | 7.02±1.36 | 0.09 (0.12)  | 0.4547              |

Abbreviations: VitD, vitamin D; OGTT, oral glucose tolerance test; FBG, fasting blood glucose; PG1H, 1h-postprandial glucose; PG2H, 2h-postprandial glucose.

\* Adjusted for maternal age, prepregnancy BMI, parity, educational level, income, physical exercise and OGTT season.

<sup>†</sup> *P* value of the interaction term SNPs \* VitD level at first trimester < 0.05.

Supplementary Table S3. Association of Gc isoforms and different time-point plasma glucose level of OGTT

| Gc subtypes           | <i>n</i> | FBG                   |                |          | PG1H                  |                |              | PG2H                  |                |              |
|-----------------------|----------|-----------------------|----------------|----------|-----------------------|----------------|--------------|-----------------------|----------------|--------------|
|                       |          | Mean ± SD<br>(mmol/L) | β (SE)         | <i>P</i> | Mean ± SD<br>(mmol/L) | β (SE)         | <i>P</i>     | Mean ± SD<br>(mmol/L) | β (SE)         | <i>P</i>     |
| Total Participants *  |          |                       |                |          |                       |                |              |                       |                |              |
| 1f/1f                 | 378      | 4.54±0.44             | Ref            | —        | 7.81±1.61             | Ref            | —            | 6.97±1.34             | Ref            | —            |
| 1f/2                  | 540      | 4.55±0.47             | -0.003 (0.027) | 0.912    | 7.77±1.65             | -0.018 (0.107) | 0.863        | 6.89±1.37             | -0.047 (0.088) | 0.593        |
| 2/2                   | 241      | 4.54±0.45             | -0.010 (0.034) | 0.767    | 7.78±1.69             | -0.054 (0.132) | 0.679        | 6.90±1.39             | -0.075 (0.108) | 0.486        |
| 1s/1f                 | 455      | 4.51±0.45             | -0.034 (0.028) | 0.239    | 7.75±1.60             | -0.039 (0.111) | 0.725        | 6.84±1.33             | -0.099 (0.091) | 0.277        |
| 1s/2                  | 369      | 4.54±0.45             | -0.011 (0.030) | 0.712    | 7.86±1.63             | 0.038 (0.117)  | 0.747        | 7.00±1.42             | 0.029 (0.096)  | 0.763        |
| 1s/1s                 | 161      | 4.52±0.49             | 0.014 (0.039)  | 0.725    | 7.85±1.71             | 0.074 (0.150)  | 0.620        | 6.97±1.29             | 0.008 (0.123)  | 0.946        |
| BMI < 24 <sup>†</sup> |          |                       |                |          |                       |                |              |                       |                |              |
| 1f/1f                 | 334      | 4.53±0.43             | Ref            | —        | 7.81±1.60             | Ref            | —            | 6.99±1.35             | Ref            | —            |
| 1f/2                  | 471      | 4.52±0.44             | -0.021 (0.028) | 0.459    | 7.68±1.60             | -0.077 (0.114) | 0.496        | 6.87±1.40             | -0.074 (0.094) | 0.429        |
| 2/2                   | 200      | 4.51±0.42             | -0.024 (0.035) | 0.490    | 7.61±1.69             | -0.151 (0.142) | 0.288        | 6.78±1.36             | -0.173 (0.117) | 0.139        |
| 1s/1f                 | 408      | 4.49±0.44             | -0.047 (0.029) | 0.105    | 7.68±1.58             | -0.089 (0.117) | 0.449        | 6.79±1.31             | -0.164 (0.096) | 0.089        |
| 1s/2                  | 325      | 4.54±0.45             | -0.009 (0.031) | 0.774    | 7.77±1.63             | -0.031 (0.124) | 0.799        | 6.92±1.42             | -0.050 (0.102) | 0.625        |
| 1s/1s                 | 144      | 4.51±0.46             | -0.002 (0.039) | 0.957    | 7.74±1.69             | -0.035 (0.158) | 0.827        | 6.94±1.24             | -0.041 (0.130) | 0.753        |
| BMI ≥ 24 <sup>†</sup> |          |                       |                |          |                       |                |              |                       |                |              |
| 1f/1f                 | 44       | 4.59±0.52             | Ref            | —        | 7.86±1.73             | Ref            | —            | 6.78±1.27             | Ref            | —            |
| 1f/2                  | 69       | 4.75±0.61             | 0.153 (0.098)  | 0.120    | 8.37±1.81             | 0.560 (0.323)  | 0.084        | 7.06±1.10             | 0.200 (0.258)  | 0.438        |
| 2/2                   | 41       | 4.69±0.53             | 0.120 (0.111)  | 0.281    | 8.64±1.38             | 0.741 (0.364)  | <b>0.043</b> | 7.50±1.39             | 0.707 (0.291)  | <b>0.016</b> |
| 1s/1f                 | 47       | 4.69±0.52             | 0.072 (0.108)  | 0.506    | 8.32±1.65             | 0.355 (0.353)  | 0.316        | 7.31±1.43             | 0.462 (0.282)  | 0.103        |
| 1s/2                  | 44       | 4.58±0.45             | 0.019 (0.110)  | 0.866    | 8.52±1.51             | 0.776 (0.360)  | <b>0.032</b> | 7.57±1.32             | 0.582 (0.288)  | <b>0.044</b> |
| 1s/1s                 | 17       | 4.66±0.70             | 0.166 (0.145)  | 0.251    | 8.83±1.57             | 1.100 (0.474)  | <b>0.021</b> | 7.20±1.68             | 0.346 (0.379)  | 0.362        |

$P_{\text{trend}} = 0.995$

$P_{\text{trend}} = \mathbf{0.031}$

$P_{\text{trend}} = \mathbf{0.037}$

---

Abbreviations: OGTT, oral glucose tolerance test; FBG, fasting blood glucose; PG1H, 1h-postprandial glucose; PG2H, 2h-postprandial glucose.

\* Adjusted for maternal age, prepregnancy BMI, parity, educational level, income, physical exercise and OGTT season.

† Adjusted for maternal age, parity, educational level, income, physical exercise and OGTT season.

Supplementary Table S4. Association of Gc isoforms with GDM. and GDM. subtypes among women with different prepregnancy BMI \*.

| Gc isoforms | <i>n</i> | GDM. †     |                                    | GDM. subtype 1 ‡                   |                   | GDM. subtype 2 ‡                   |                       | GDM. subtype 3 ‡                   |                   |
|-------------|----------|------------|------------------------------------|------------------------------------|-------------------|------------------------------------|-----------------------|------------------------------------|-------------------|
|             |          | case (%)   | OR (95% CI)                        | case (%)                           | OR (95% CI)       | case (%)                           | OR (95% CI)           | case (%)                           | OR (95% CI)       |
| BMI < 24    |          |            |                                    |                                    |                   |                                    |                       |                                    |                   |
| 1f/1f       | 334      | 76 (22.8)  | Ref                                | 21 (6.3)                           | Ref               | 42 (12.6)                          | Ref                   | 13 (3.9)                           | Ref               |
| 1f/2        | 471      | 105 (22.3) | 0.99 (0.71-1.40)                   | 30 (6.4)                           | 0.92 (0.51-1.66)  | 67 (14.2)                          | 1.19 (0.78-1.83)      | 8 (1.7)                            | 0.44 (0.18-1.10)  |
| 2/2         | 200      | 44 (22.0)  | 0.98 (0.64-1.50)                   | 13 (6.5)                           | 0.98 (0.47-2.04)  | 27 (13.5)                          | 1.16 (0.68-1.97)      | 4 (2.0)                            | 0.46 (0.14-1.48)  |
| 1s/1f       | 408      | 83 (20.3)  | 0.88 (0.62-1.26)                   | 22 (5.4)                           | 0.79 (0.42-1.48)  | 50 (12.3)                          | 1.01 (0.64-1.58)      | 11 (2.7)                           | 0.66 (0.29-1.54)  |
| 1s/2        | 325      | 77 (23.7)  | 1.05 (0.73-1.52)                   | 24 (7.4)                           | 1.10 (0.59-2.06)  | 47 (14.5)                          | 1.22 (0.77-1.93)      | 6 (1.9)                            | 0.45 (0.17-1.24)  |
| 1s/1s       | 144      | 32 (22.2)  | 1.00 (0.62-1.62)                   | 7 (4.9)                            | 0.79 (0.32-1.95)  | 22 (15.3)                          | 1.24 (0.70-2.20)      | 3 (2.1)                            | 0.62 (0.17-2.30)  |
| BMI ≥ 24    |          |            |                                    |                                    |                   |                                    |                       |                                    |                   |
| 1f/1f       | 44       | 7 (15.9)   | Ref                                | 3 (6.8)                            | Ref               | 1 (2.3)                            | Ref                   | 3 (6.8)                            | Ref               |
| 1f/2        | 69       | 24 (34.8)  | 2.81 (1.06-7.50) §                 | 9 (13.0)                           | 2.96 (0.67-13.02) | 8 (11.6)                           | 6.11 (0.71-52.29)     | 7 (10.1)                           | 1.99 (0.43-9.11)  |
| 2/2         | 41       | 15 (36.6)  | 3.09 (1.04-9.21) §                 | 3 (7.3)                            | 1.10 (0.17-7.30)  | 8 (19.5)                           | 11.01 (1.24-98.11) §  | 4 (9.8)                            | 2.38 (0.41-13.81) |
| 1s/1f       | 47       | 20 (42.6)  | 3.54 (1.26-9.94) §                 | 7 (14.9)                           | 3.84 (0.80-18.41) | 9 (19.2)                           | 11.00 (1.28-94.90) §  | 4 (8.5)                            | 1.28 (0.23-7.15)  |
| 1s/2        | 44       | 20 (45.5)  | 4.18 (1.46-11.94) §                | 4 (9.1)                            | 2.48 (0.45-13.66) | 12 (27.3)                          | 15.23 (1.79-129.64) § | 4 (9.1)                            | 2.17 (0.40-11.80) |
| 1s/1s       | 17       | 8 (47.1)   | 5.62 (1.53-20.57) §                | 1 (5.9)                            | 1.56 (0.13-18.37) | 5 (29.4)                           | 20.45 (2.01-207.97) § | 2 (11.8)                           | 4.46 (0.53-37.37) |
|             |          |            | <i>P</i> <sub>trend</sub> = 0.0046 | <i>P</i> <sub>trend</sub> = 0.4177 |                   | <i>P</i> <sub>trend</sub> = 0.0011 |                       | <i>P</i> <sub>trend</sub> = 0.3643 |                   |

Abbreviations: GDM., gestational diabetes mellitus; subtype 1, elevated fasting glucose and normal postload glucose; subtype 2, normal fasting glucose and elevated postload glucose; subtype 3, elevated fasting and postload glucose.

\* Adjusted for maternal age, parity, educational level, income, physical exercise and OGTT season.

† Binomial logistic regression model; ‡ Multinomial logistic regression model.

§ *P* < 0.05.
